# Supplementary material
Source: PubMed Central journal article supplement (PMC2954446)

Figure S1: Funnel plots with pseudo 95% confidence intervals examining publication bias in first trimester using the highest category of caffeine intake.

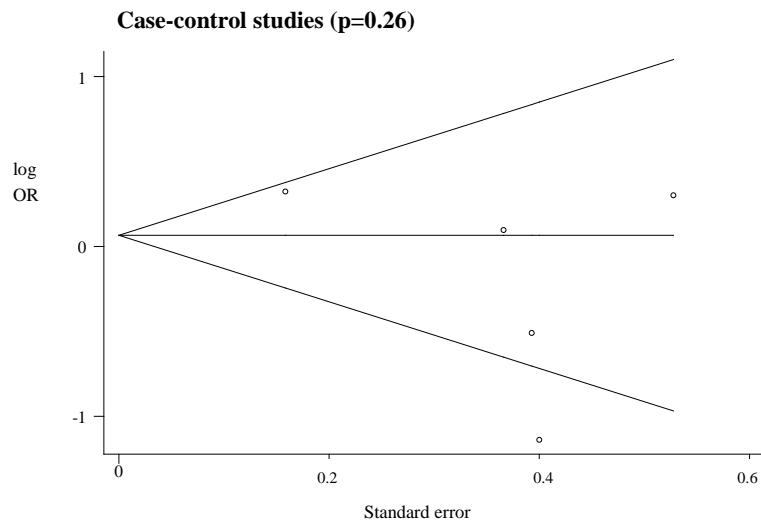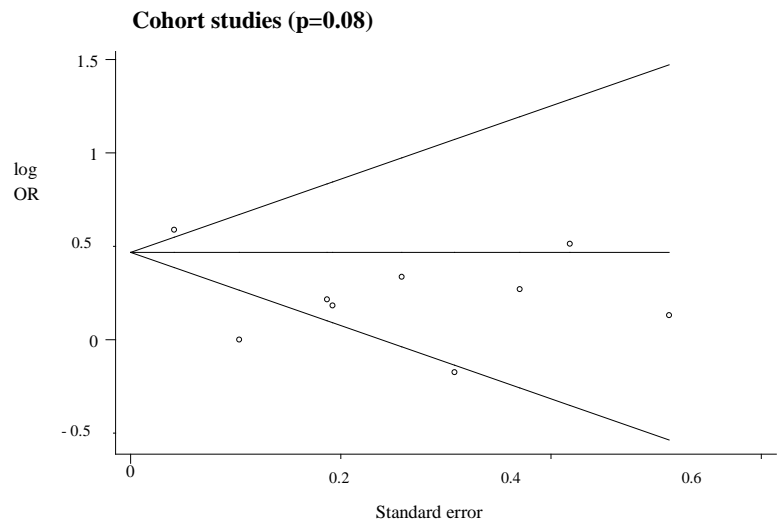

Supplement: supp_2010.29789_AJCN-29789-sd01-FigureS1_2.pdf [file supp_2010.29789_AJCN-29789-sd01-FigureS1_2.pdf]
